# Supplementary material for: Deuterium isotope effects in drug pharmacokinetics II: Substrate-dependence of the reaction mechanism influences outcome for cytochrome P450 cleared drugs
Source: PubMed Central journal article supplement (PMC6235261; doi:10.1371/journal.pone.0206279), 2018-11-14

## **S2 Supporting Information**

Deuterium isotope effects in drug pharmacokinetics II: Substrate-dependence of the reaction mechanism influences outcome for cytochrome P450 cleared drugs

Hao Sun,\* David W. Piotrowski\*, Suvi T. M. Orr, Joseph S. Warmus, Angela C. Wolford, Stephen B. Coffey, Kentaro Futatsugi, Yinsheng Zhang and Alfin D. N. Vaz\*

Medicine Design, Pfizer Global Research and Development, Groton, Connecticut, United States of America

**Fig A.**

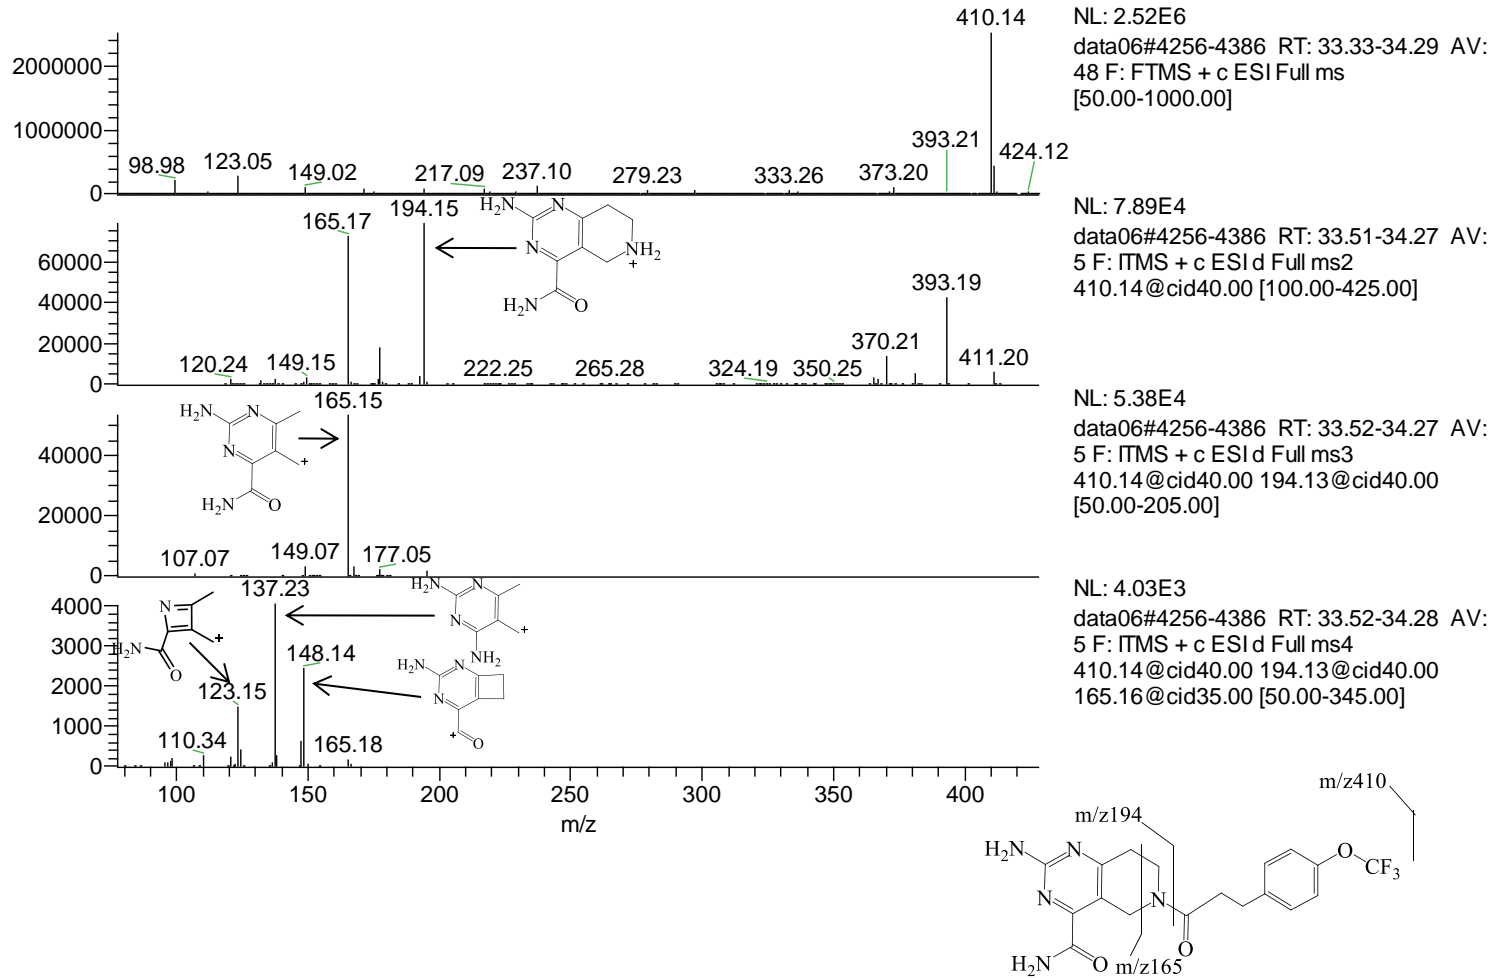

**Fig B.**

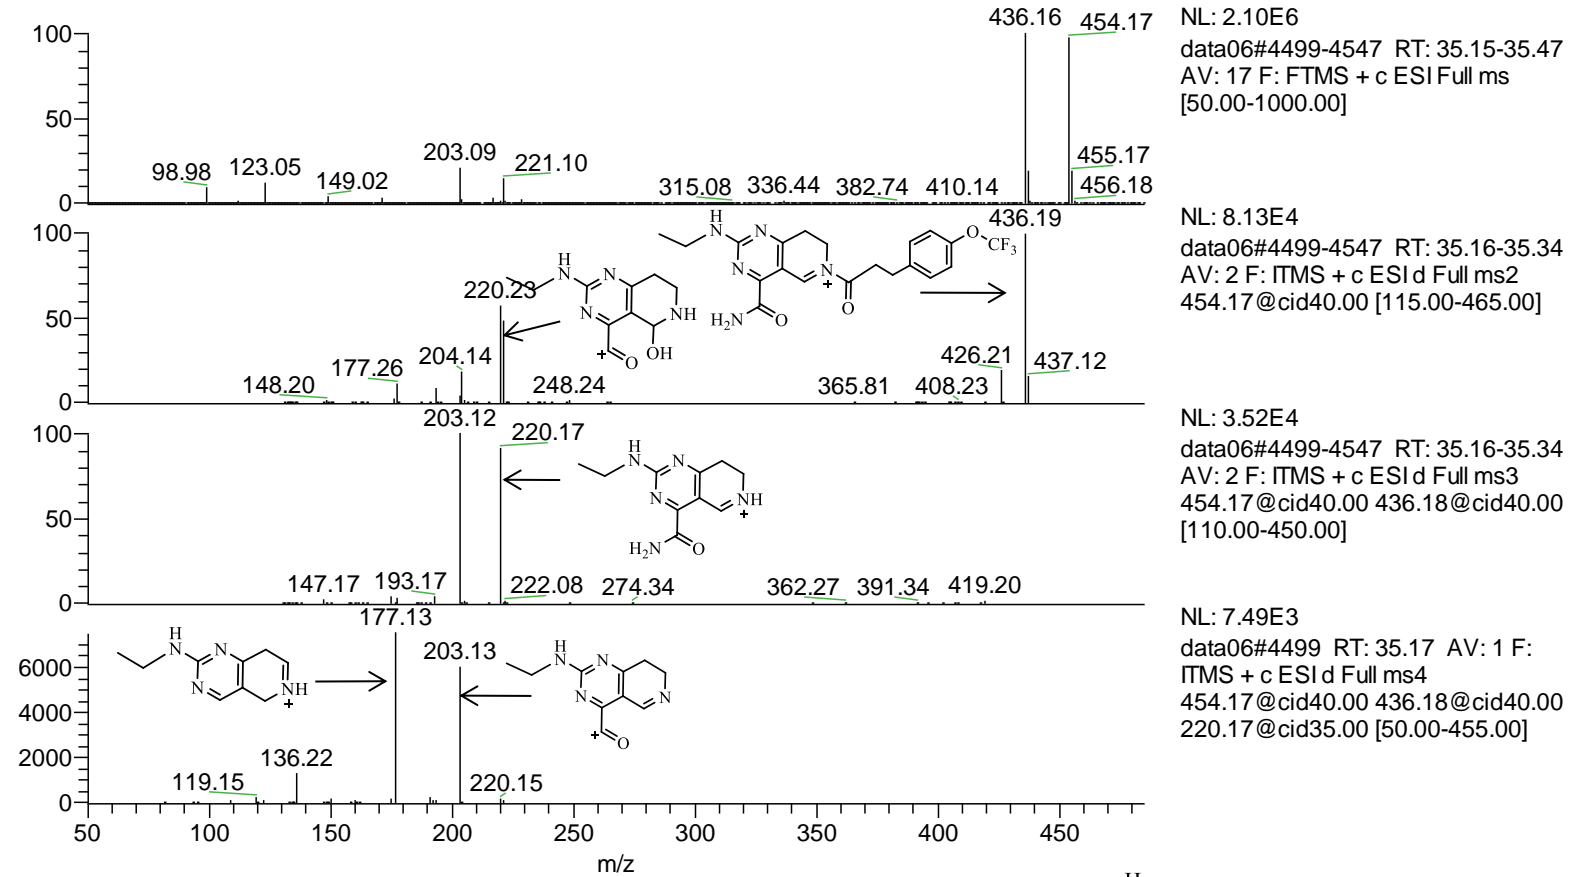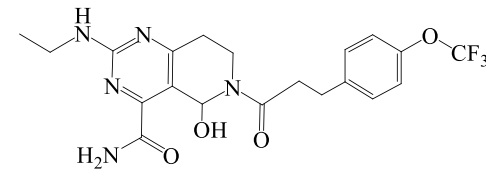

Fig C.

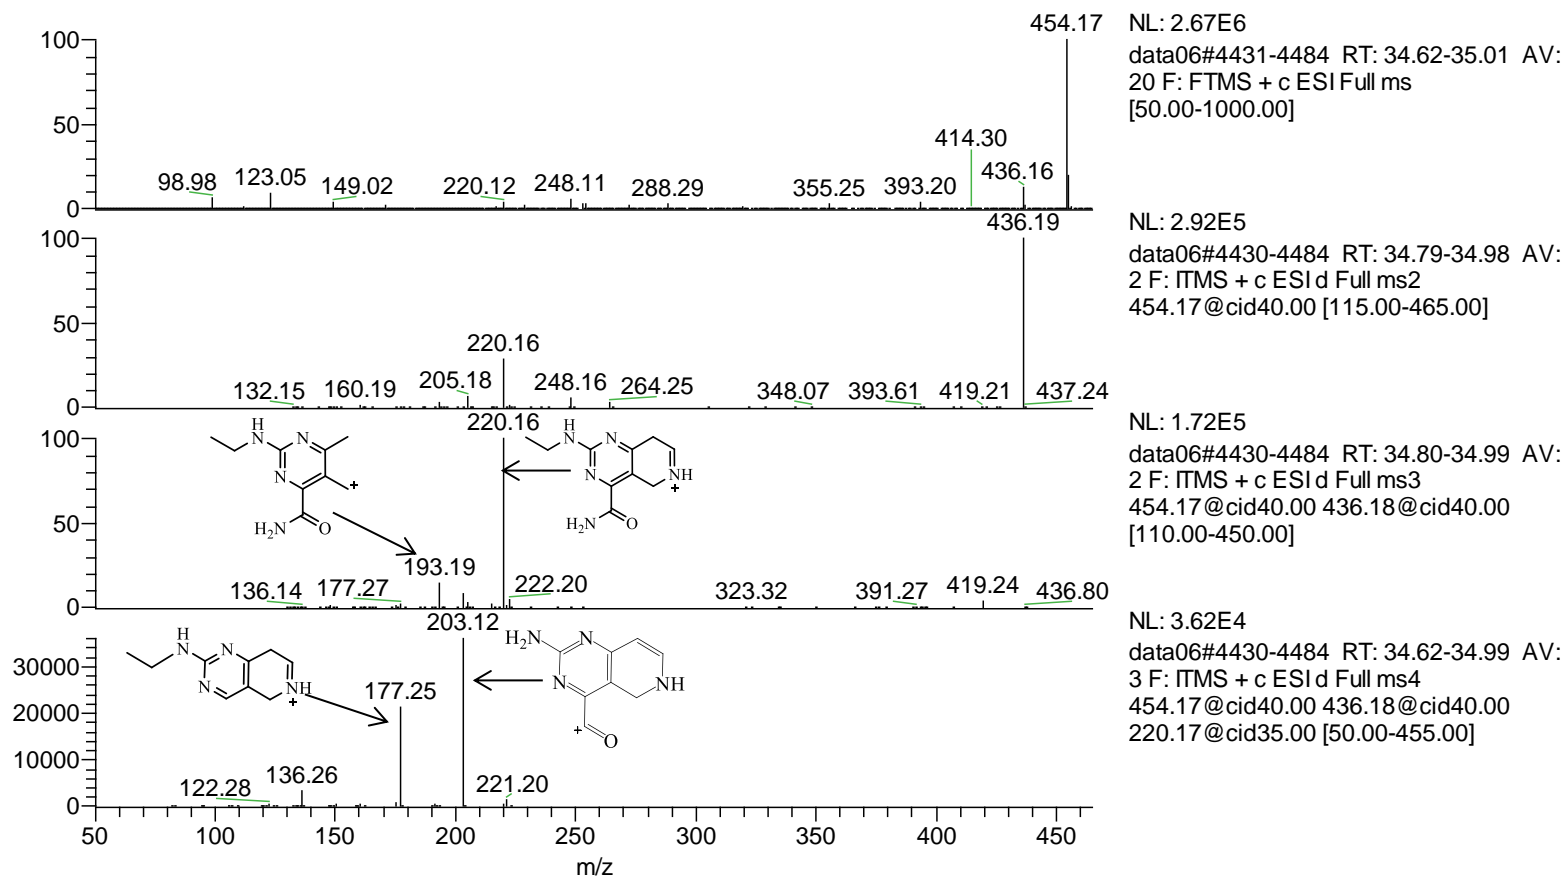

Integration = 0.63 E8 MS; 0.03 E6 UV

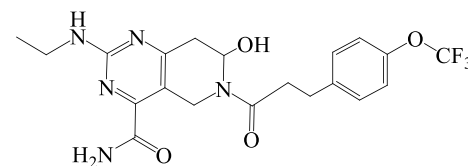

**Fig D.**

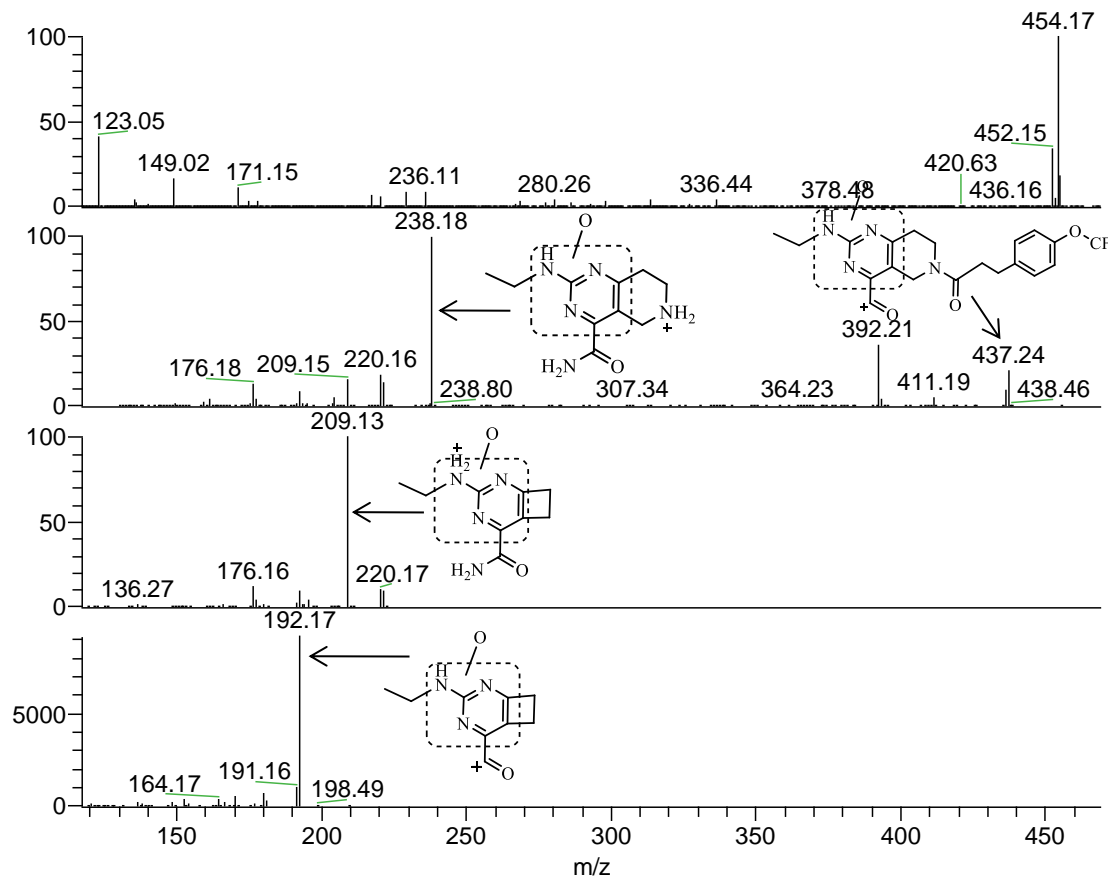

NL: 6.55E5  
data06#4629-4678 RT: 36.09-36.45 AV:  
20 F: FTMS + c ESI Full ms  
[50.00-1000.00]

NL: 3.04E4  
data06#4629-4678 RT: 36.10-36.46 AV:  
3 F: ITMS + c ESI d Full ms2  
454.17@cid40.00 [115.00-465.00]

NL: 1.83E4  
data06#4629-4678 RT: 36.10-36.28 AV:  
2 F: ITMS + c ESI d Full ms3  
454.17@cid40.00 238.27@cid40.00  
[55.00-250.00]

NL: 9.16E3  
data06#4629-4678 RT: 36.11-36.29 AV:  
2 F: ITMS + c ESI d Full ms4  
454.17@cid40.00 238.16@cid40.00  
209.11@cid35.00 [50.00-430.00]

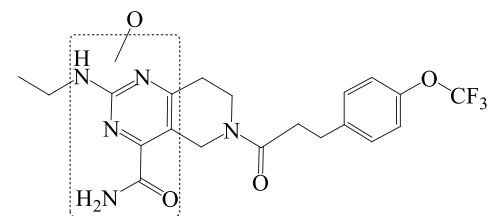

**Fig E.**

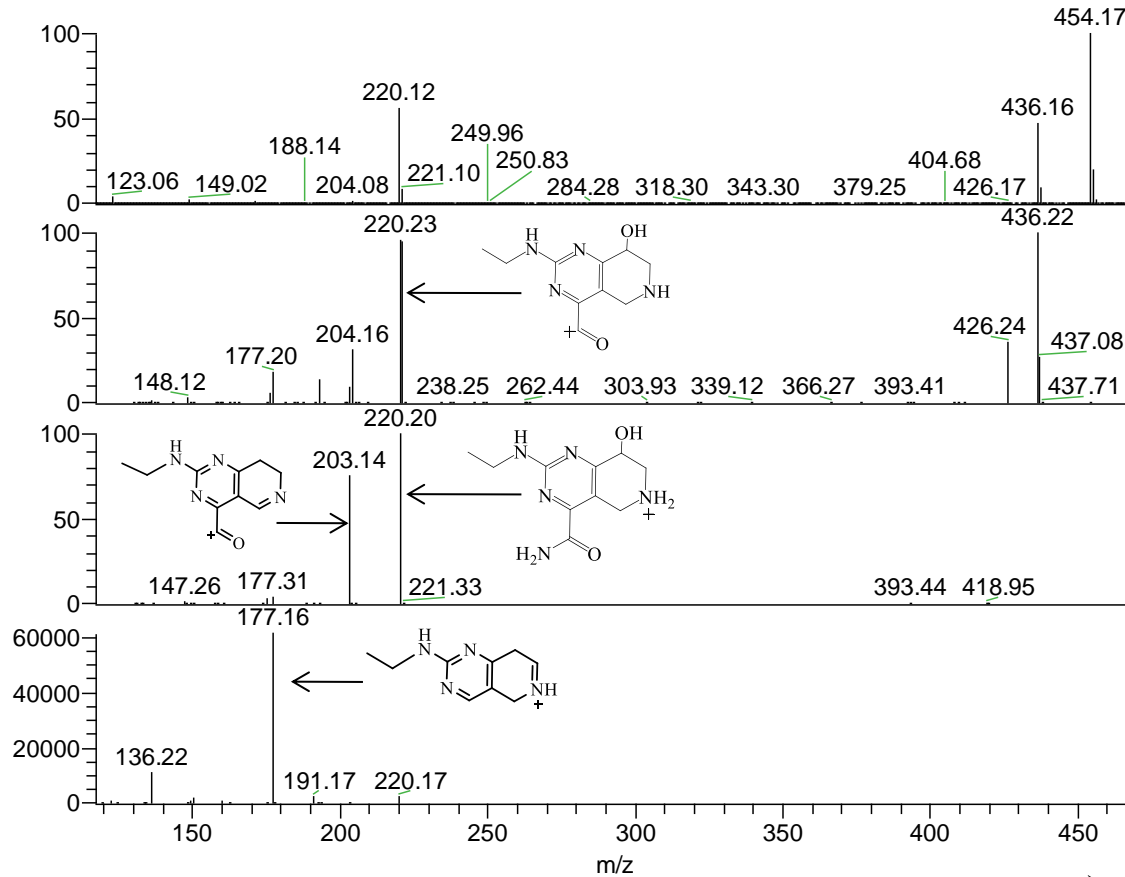

NL: 5.84E6  
 data06#4756-4817 RT: 37.07-37.47  
 AV: 20 F: FTMS + c ESI Full ms  
 [50.00-1000.00]

NL: 1.56E5  
 data06#4757-4817 RT: 37.08-37.44  
 AV: 3 F: ITMS + c ESI d Full ms2  
 454.17@cid40.00 [115.00-465.00]

NL: 1.69E5  
 data06#4757 RT: 37.26 AV: 1 F:  
 ITMS + c ESI d Full ms3  
 454.17@cid40.00 436.18@cid40.00  
 [110.00-450.00]

NL: 6.11E4  
 data06#4757 RT: 37.26 AV: 1 F:  
 ITMS + c ESI d Full ms4  
 454.17@cid40.00 436.18@cid40.00  
 220.17@cid35.00 [50.00-455.00]

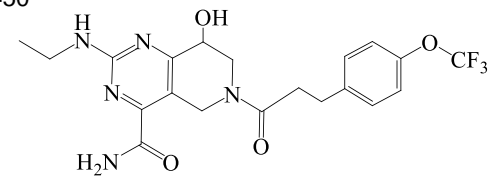

Fig F.

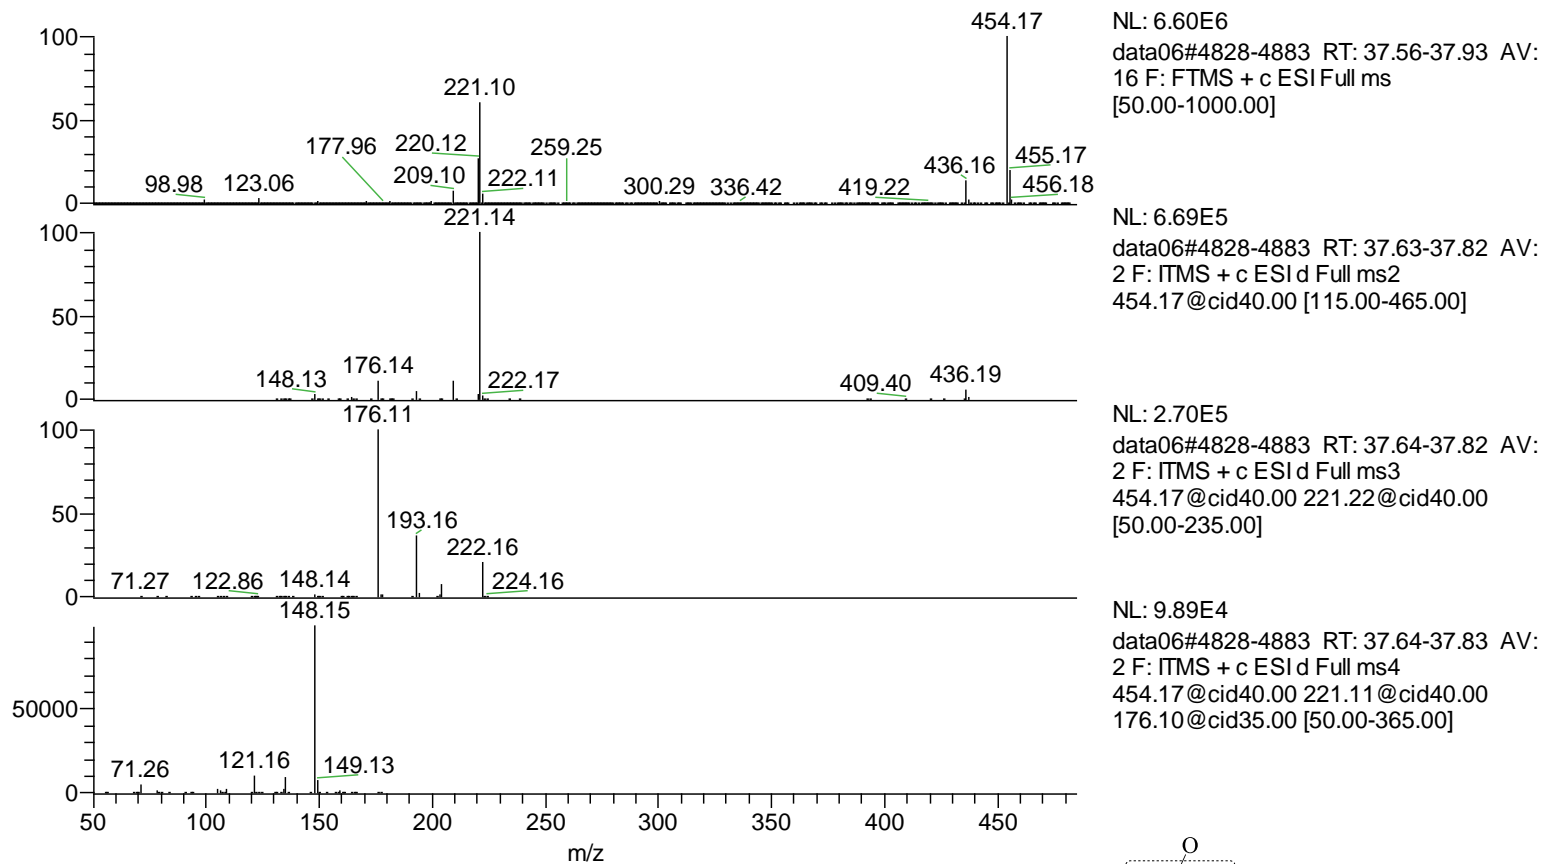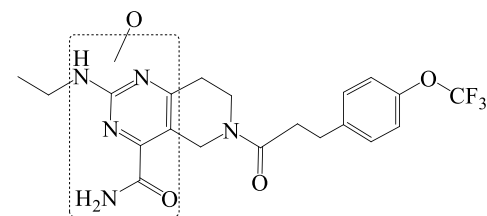

Fig G.

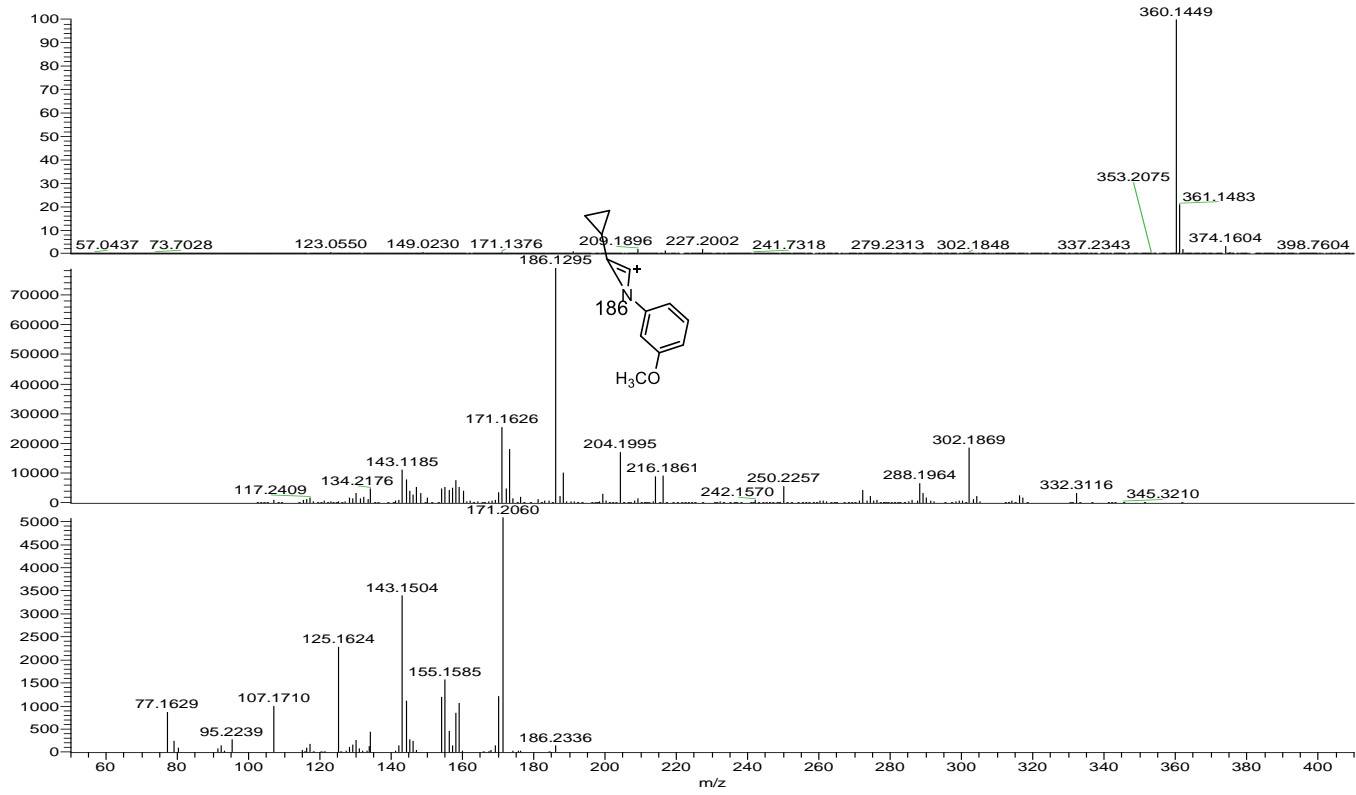

NL: 6.81E6  
 data07#5461-5555 RT:  
 43.61-44.28 AV: 36 F: FTMS +  
 + c ESI Full ms  
 [50.00-1000.00]

NL: 7.88E4  
 data07#5461-5556 RT:  
 43.64-44.18 AV: 4 F: ITMS +  
 c ESI d Full ms2  
 360.14@cid40.00  
 [85.00-375.00]

NL: 5.08E3  
 data07#5461-5556 RT:  
 43.64-44.19 AV: 4 F: ITMS +  
 c ESI d Full ms3  
 360.14@cid40.00  
 186.14@cid40.00  
 [50.00-200.00]

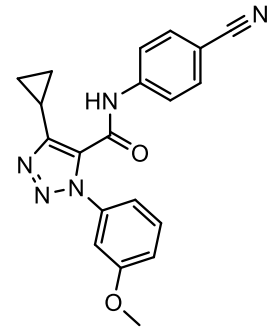



Fig H.

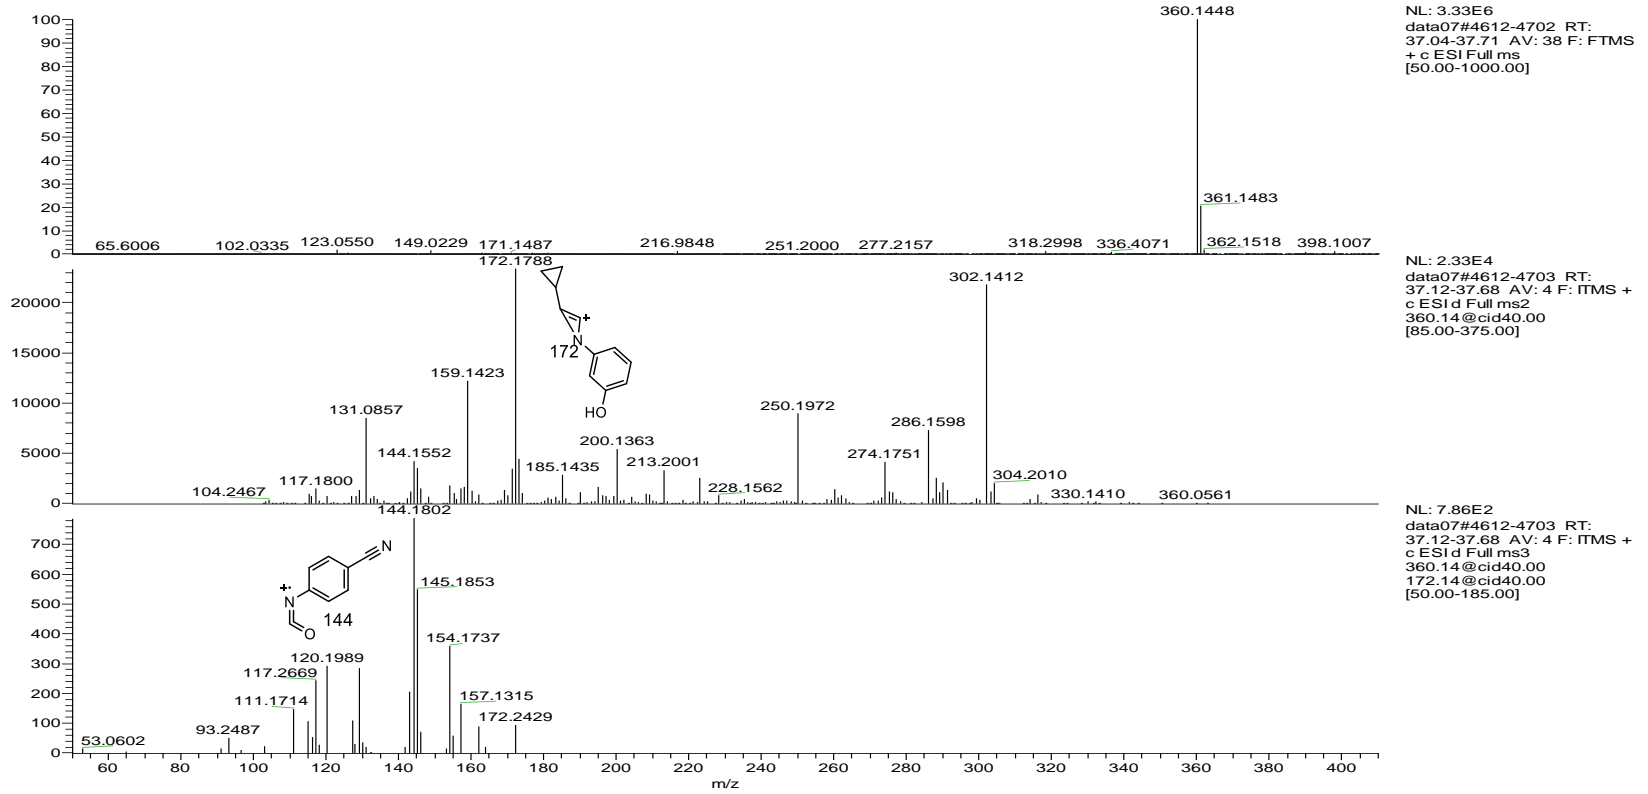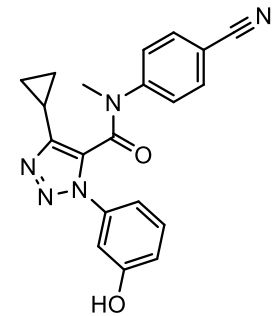

Fig I.

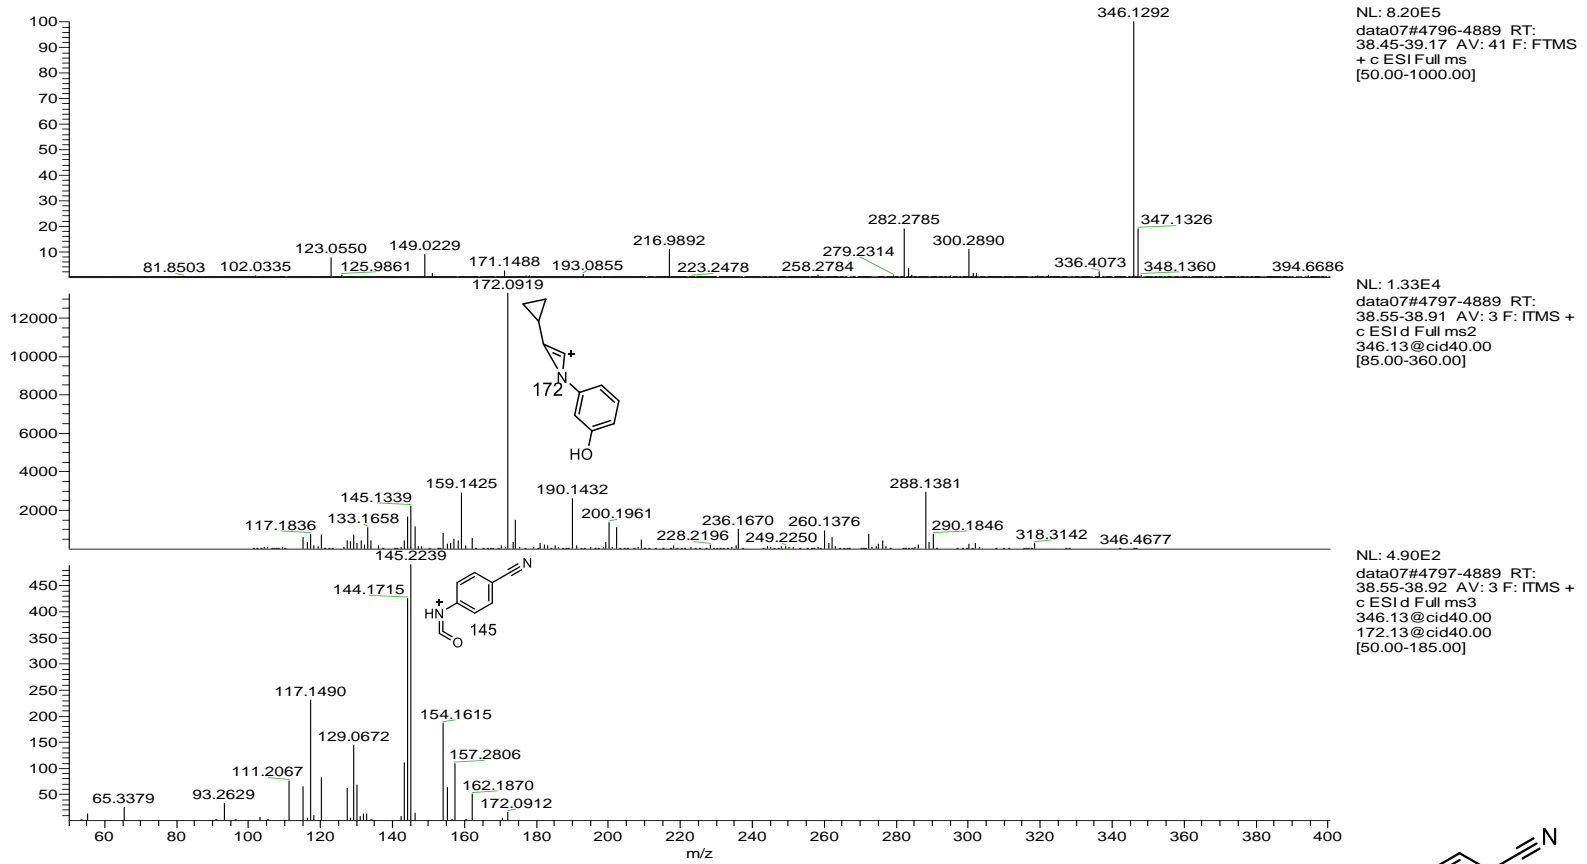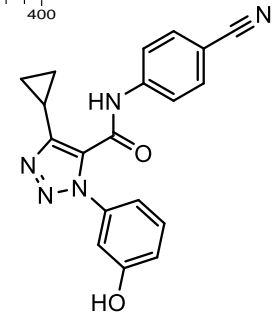

Supplement: pone.0206279.s002.pdf [file pone.0206279.s002.pdf]
